# Supplementary material for: Induction of tumor initiation is dependent on CD44s in c-Met+ hepatocellular carcinoma
Source: Springer Nature journal article supplement (doi:10.1186/s12885-015-1166-4), 2015-03-20

**A**

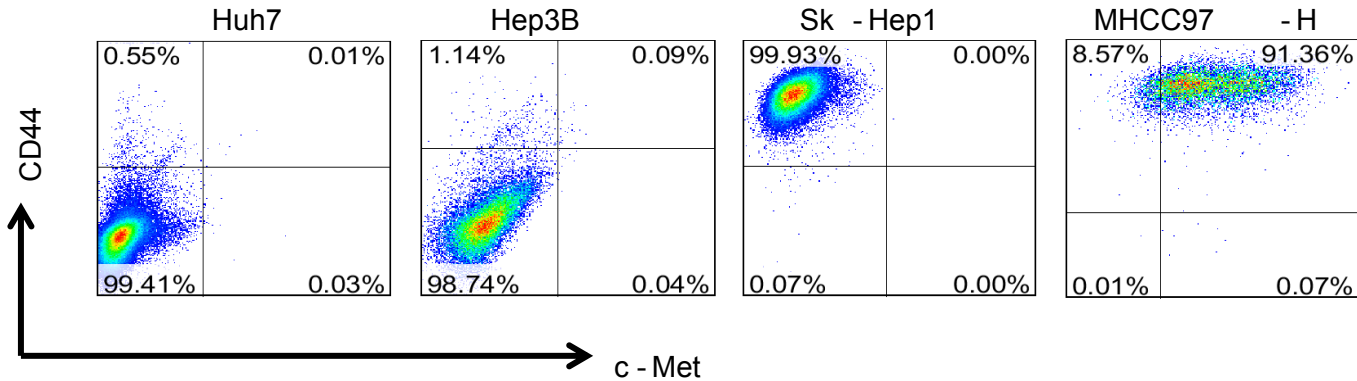

**B**

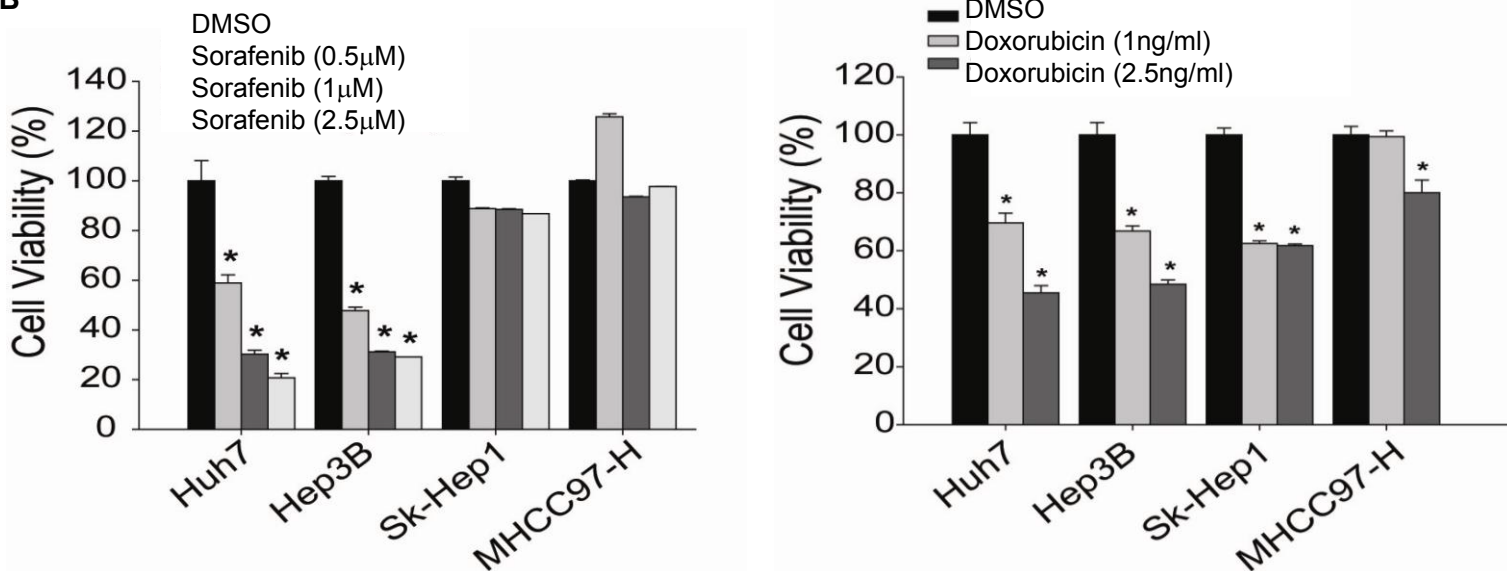

**C**

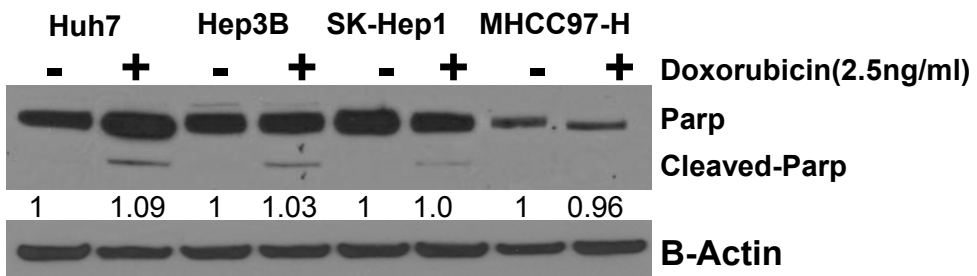

Supplement: MOESM2 [file 9744118]
